# Supplementary material for: Survival of HT29 cancer cells is influenced by hepatocyte growth factor receptor inhibition through modulation of self-DNA-triggered TLR9-dependent autophagy response
Source: PubMed Central journal article supplement (PMC9098092; doi:10.1371/journal.pone.0268217), 2022-05-12
Supplement: pone.0268217.s003.pdf [file pone.0268217.s003.pdf]

Supplementary Table 1.

|     | AlamarBlue | SD  |
|-----|------------|-----|
| K   | 100        | 1,1 |
| O   | 120,17     | 4,5 |
| D   | 111,41     | 3,8 |
| C   | 116,23     | 2,9 |
| Kg  | 127,51     | 3,1 |
| Kf  | 112,61     | 2,2 |
| Km  | 147,87     | 3,4 |
| gO  | 139        | 3,1 |
| gD  | 134,44     | 2,7 |
| gC  | 123,55     | 3,1 |
| gOD | 75,75      | 2,6 |
| gDC | 90,99      | 3,3 |
| fo  | 198,02     | 4,7 |
| fd  | 120,87     | 3,7 |
| fC  | 121,18     | 2,5 |
| fOD | 99,61      | 2,3 |
| fDC | 107,62     | 3,2 |
| mO  | 155,15     | 4,1 |
| mD  | 141,85     | 3,9 |
| mC  | 183,48     | 4,6 |
| mOD | 90,12      | 2,5 |
| mDC | 92,34      | 3,1 |

| Descriptive statistics of the treatments: |                   |                       |                     |             |                   |             |             |              |
|-------------------------------------------|-------------------|-----------------------|---------------------|-------------|-------------------|-------------|-------------|--------------|
| Treatment -->                             | K                 | O                     | D                   | C           | Kg                | Kf          | Km          | Pooled Total |
| observations N                            | 3                 | 3                     | 3                   | 3           | 3                 | 3           | 3           | 21           |
| sum $\sum_{i=1}^n x_i$                    | 300.0000          | 360.5100              | 334.2300            | 348.6900    | 382.5300          | 337.8300    | 443.6100    | 2,507.4000   |
| mean "xx"                                 | 100.0000          | 120.1700              | 111.4100            | 116.2300    | 127.5100          | 112.6100    | 147.8700    | 119.4000     |
| sum of squares $\sum_{i=1}^n x_i^2$       | 30,002.4200       | 43,362.9867           | 37,265.4443         | 40,545.0587 | 48,795.6203       | 38,052.7163 | 65,619.7307 | 303,643.9770 |
| sample variance $s^2$                     | 1.2100            | 20.2500               | 14.4400             | 8.4100      | 9.6100            | 4.8400      | 11.5600     | 213.0209     |
| sample std. dev. "s"                      | 1.1000            | 4.5000                | 3.8000              | 2.9000      | 3.1000            | 2.2000      | 3.4000      | 14.5952      |
| std. dev. of mean SE "xSEX"               | 0.6351            | 2.5981                | 2.1939              | 1.6743      | 1.7898            | 1.2702      | 1.9630      | 3.1849       |
| One-way ANOVA of the treatments:          |                   |                       |                     |             |                   |             |             |              |
| source                                    | sum of squares SS | degrees of freedom vv | mean square MS      | F statistic | p-value           |             |             |              |
| treatment                                 | 4,119.7770        | 6                     | 686.6295            | 68.3505     | <b>1.4503e-09</b> |             |             |              |
| error                                     | 140.6400          | 14                    | 10.0457             |             |                   |             |             |              |
| total                                     | 4,260.4170        | 20                    |                     |             |                   |             |             |              |
| Tukey HSD results                         |                   |                       |                     |             |                   |             |             |              |
| treatments                                | Tukey HSD         | Tukey HSD             | Tukey HSD           |             |                   |             |             |              |
| pair                                      | Q statistic       | p-value               | inference           |             |                   |             |             |              |
| K vs O                                    | 11.0224           | <b>0.0010053</b>      | <b>** p&lt;0.01</b> |             |                   |             |             |              |
| K vs D                                    | 6.2353            | <b>0.0082450</b>      | <b>** p&lt;0.01</b> |             |                   |             |             |              |
| K vs C                                    | 8.8693            | <b>0.0010053</b>      | <b>** p&lt;0.01</b> |             |                   |             |             |              |
| K vs Kg                                   | 15.0335           | <b>0.0010053</b>      | <b>** p&lt;0.01</b> |             |                   |             |             |              |
| K vs Kf                                   | 6.8910            | <b>0.0035694</b>      | <b>** p&lt;0.01</b> |             |                   |             |             |              |
| K vs Km                                   | 26.1598           | <b>0.0010053</b>      | <b>** p&lt;0.01</b> |             |                   |             |             |              |
| O vs D                                    | 4.7871            | <b>0.0527418</b>      | insignificant       |             |                   |             |             |              |
| O vs C                                    | 2.1531            | <b>0.7068347</b>      | insignificant       |             |                   |             |             |              |
| O vs Kg                                   | 4.0111            | <b>0.1353000</b>      | insignificant       |             |                   |             |             |              |
| O vs Kf                                   | 4.1314            | <b>0.1177960</b>      | insignificant       |             |                   |             |             |              |
| O vs Km                                   | 15.1374           | <b>0.0010053</b>      | <b>** p&lt;0.01</b> |             |                   |             |             |              |
| D vs C                                    | 2.6340            | <b>0.5291763</b>      | insignificant       |             |                   |             |             |              |
| D vs Kg                                   | 8.7982            | <b>0.0010053</b>      | <b>** p&lt;0.01</b> |             |                   |             |             |              |
| D vs Kf                                   | 0.6558            | <b>0.8999947</b>      | insignificant       |             |                   |             |             |              |
| D vs Km                                   | 19.9245           | <b>0.0010053</b>      | <b>** p&lt;0.01</b> |             |                   |             |             |              |
| C vs Kg                                   | 6.1642            | <b>0.0090323</b>      | <b>** p&lt;0.01</b> |             |                   |             |             |              |
| C vs Kf                                   | 1.9782            | <b>0.7714362</b>      | insignificant       |             |                   |             |             |              |
| C vs Km                                   | 17.2905           | <b>0.0010053</b>      | <b>** p&lt;0.01</b> |             |                   |             |             |              |
| Kg vs Kf                                  | 8.1425            | <b>0.0010053</b>      | <b>** p&lt;0.01</b> |             |                   |             |             |              |
| Kg vs Km                                  | 11.1262           | <b>0.0010053</b>      | <b>** p&lt;0.01</b> |             |                   |             |             |              |
| Kf vs Km                                  | 19.2687           | <b>0.0010053</b>      | <b>** p&lt;0.01</b> |             |                   |             |             |              |

| Descriptive statistics of the treatments: |             |                  |                     |             |                   |             |              |
|-------------------------------------------|-------------|------------------|---------------------|-------------|-------------------|-------------|--------------|
| Treatment →                               | K           | gO               | gD                  | gC          | gOD               | gDC         | Pooled Total |
| observations N                            | 3           | 3                | 3                   | 3           | 3                 | 3           | 18           |
| sum $\sum x_i$                            | 300.0000    | 417.0000         | 403.3200            | 370.6500    | 227.2800          | 272.9700    | 1,991.2200   |
| mean $\bar{x}$                            | 100.0000    | 139.0000         | 134.4400            | 123.5500    | 75.7600           | 90.9900     | 110.6233     |
| sum of squares $\sum x_i^2$               | 30,002.4200 | 57,982.2200      | 54,236.9208         | 45,813.0275 | 17,232.4094       | 24,859.3203 | 230,126.3180 |
| sample variance $s^2$                     | 1.2100      | 9.6100           | 7.2900              | 9.6100      | 6.8383            | 10.8900     | 579.4661     |
| sample std. dev. $s$                      | 1.1000      | 3.1000           | 2.7000              | 3.1000      | 2.6150            | 3.3000      | 24.0721      |
| std. dev. of mean $SE_{\bar{x}}$          | 0.6351      | 1.7898           | 1.5588              | 1.7898      | 1.5098            | 1.9053      | 5.6738       |
| <b>One-way ANOVA of the treatments:</b>   |             |                  |                     |             |                   |             |              |
|                                           | sum of      | degrees of       | mean square         |             |                   |             |              |
| source                                    | squares SS  | freedom vv       | MS                  | F statistic | p-value           |             |              |
| treatment                                 | 9,760.0276  | 5                | 1,952.0055          | 257.7001    | <b>8.9428e-12</b> |             |              |
| error                                     | 90.8966     | 12               | 7.5747              |             |                   |             |              |
| total                                     | 9,850.9242  | 17               |                     |             |                   |             |              |
| <b>Tukey HSD results</b>                  |             |                  |                     |             |                   |             |              |
| treatments                                | Tukey HSD   | Tukey HSD        | Tukey HSD           |             |                   |             |              |
| pair                                      | Q statistic | p-value          | inference           |             |                   |             |              |
| <b>K vs gO</b>                            | 24.5438     | <b>0.0010053</b> | <b>** p&lt;0.01</b> |             |                   |             |              |
| <b>K vs gD</b>                            | 21.6741     | <b>0.0010053</b> | <b>** p&lt;0.01</b> |             |                   |             |              |
| <b>K vs gC</b>                            | 14.8207     | <b>0.0010053</b> | <b>** p&lt;0.01</b> |             |                   |             |              |
| <b>K vs gOD</b>                           | 15.2549     | <b>0.0010053</b> | <b>** p&lt;0.01</b> |             |                   |             |              |
| <b>K vs gDC</b>                           | 5.6703      | <b>0.0167034</b> | <b>* p&lt;0.05</b>  |             |                   |             |              |
| <b>gO vs gD</b>                           | 2.8697      | <b>0.3825024</b> | insignificant       |             |                   |             |              |
| <b>gO vs gC</b>                           | 9.7231      | <b>0.0010053</b> | <b>** p&lt;0.01</b> |             |                   |             |              |
| <b>gO vs gOD</b>                          | 39.7987     | <b>0.0010053</b> | <b>** p&lt;0.01</b> |             |                   |             |              |
| <b>gO vs gDC</b>                          | 30.2141     | <b>0.0010053</b> | <b>** p&lt;0.01</b> |             |                   |             |              |
| <b>gD vs gC</b>                           | 6.8534      | <b>0.0041561</b> | <b>** p&lt;0.01</b> |             |                   |             |              |
| <b>gD vs gOD</b>                          | 36.9290     | <b>0.0010053</b> | <b>** p&lt;0.01</b> |             |                   |             |              |
| <b>gD vs gDC</b>                          | 27.3443     | <b>0.0010053</b> | <b>** p&lt;0.01</b> |             |                   |             |              |
| <b>gC vs gOD</b>                          | 30.0756     | <b>0.0010053</b> | <b>** p&lt;0.01</b> |             |                   |             |              |
| <b>gC vs gDC</b>                          | 20.4909     | <b>0.0010053</b> | <b>** p&lt;0.01</b> |             |                   |             |              |
| <b>gOD vs gDC</b>                         | 9.5847      | <b>0.0010053</b> | <b>** p&lt;0.01</b> |             |                   |             |              |

| Descriptive statistics of the treatments: |             |                  |                     |             |                   |             |              |
|-------------------------------------------|-------------|------------------|---------------------|-------------|-------------------|-------------|--------------|
| Treatment →                               | K           | fO               | fD                  | fC          | fOD               | fDC         | Pooled Total |
| observations N                            | 3           | 3                | 3                   | 3           | 3                 | 3           | 18           |
| sum $\sum x_i$                            | 300.0000    | 594.0600         | 362.6100            | 363.5400    | 298.8300          | 322.8600    | 2,241.9000   |
| mean $\bar{x}$                            | 100.0000    | 198.0200         | 120.8700            | 121.1800    | 99.6100           | 107.6200    | 124.5500     |
| sum of squares $\sum x_i^2$               | 30,002.4200 | 117,679.9412     | 43,856.0507         | 44,066.2772 | 29,777.0363       | 34,766.6732 | 300,148.3986 |
| sample variance $s^2$                     | 1.2100      | 22.0900          | 13.6900             | 6.2500      | 5.2900            | 10.2400     | 1,230.5737   |
| sample std. dev. $s$                      | 1.1000      | 4.7000           | 3.7000              | 2.5000      | 2.3000            | 3.2000      | 35.0795      |
| std. dev. of mean $SE_{\bar{x}}$          | 0.6351      | 2.7135           | 2.1362              | 1.4434      | 1.3279            | 1.8475      | 8.2683       |
| <b>One-way ANOVA of the treatments:</b>   |             |                  |                     |             |                   |             |              |
|                                           | sum of      | degrees of       | mean square         |             |                   |             |              |
| source                                    | squares SS  | freedom vv       | MS                  | F statistic | p-value           |             |              |
| treatment                                 | 20,802.2136 | 5                | 4,160.4427          | 424.7517    | <b>4.5797e-13</b> |             |              |
| error                                     | 117.5400    | 12               | 9.7950              |             |                   |             |              |
| total                                     | 20,919.7536 | 17               |                     |             |                   |             |              |
| <b>Tukey HSD results</b>                  |             |                  |                     |             |                   |             |              |
| treatments                                | Tukey HSD   | Tukey HSD        | Tukey HSD           |             |                   |             |              |
| pair                                      | Q statistic | p-value          | inference           |             |                   |             |              |
| <b>K vs fO</b>                            | 54.2467     | <b>0.0010053</b> | <b>** p&lt;0.01</b> |             |                   |             |              |
| <b>K vs fD</b>                            | 11.5500     | <b>0.0010053</b> | <b>** p&lt;0.01</b> |             |                   |             |              |
| <b>K vs fC</b>                            | 11.7215     | <b>0.0010053</b> | <b>** p&lt;0.01</b> |             |                   |             |              |
| <b>K vs fOD</b>                           | 0.2158      | <b>0.8999947</b> | insignificant       |             |                   |             |              |
| <b>K vs fDC</b>                           | 4.2171      | <b>0.0932784</b> | insignificant       |             |                   |             |              |
| <b>fO vs fD</b>                           | 42.6967     | <b>0.0010053</b> | <b>** p&lt;0.01</b> |             |                   |             |              |
| <b>fO vs fC</b>                           | 42.5251     | <b>0.0010053</b> | <b>** p&lt;0.01</b> |             |                   |             |              |
| <b>fO vs fOD</b>                          | 54.4625     | <b>0.0010053</b> | <b>** p&lt;0.01</b> |             |                   |             |              |
| <b>fO vs fDC</b>                          | 50.0296     | <b>0.0010053</b> | <b>** p&lt;0.01</b> |             |                   |             |              |
| <b>fD vs fC</b>                           | 0.1716      | <b>0.8999947</b> | insignificant       |             |                   |             |              |
| <b>fD vs fOD</b>                          | 11.7658     | <b>0.0010053</b> | <b>** p&lt;0.01</b> |             |                   |             |              |
| <b>fD vs fDC</b>                          | 7.3329      | <b>0.0024090</b> | <b>** p&lt;0.01</b> |             |                   |             |              |
| <b>fC vs fOD</b>                          | 11.9374     | <b>0.0010053</b> | <b>** p&lt;0.01</b> |             |                   |             |              |
| <b>fC vs fDC</b>                          | 7.5044      | <b>0.0019876</b> | <b>** p&lt;0.01</b> |             |                   |             |              |
| <b>fOD vs fDC</b>                         | 4.4329      | <b>0.0727690</b> | insignificant       |             |                   |             |              |

| Descriptive statistics of the treatments: |                   |                      |                     |              |                   |             |              |
|-------------------------------------------|-------------------|----------------------|---------------------|--------------|-------------------|-------------|--------------|
| Treatment →                               | K                 | mO                   | mD                  | mC           | mOD               | mDC         | Pooled Total |
| observations N                            | 3                 | 3                    | 3                   | 3            | 3                 | 3           | 18           |
| sum $\sum x_i$                            | 300.0000          | 465.4500             | 425.5500            | 550.4400     | 270.3600          | 277.0200    | 2,288.8200   |
| mean $\bar{x}$                            | 100.0000          | 155.1500             | 141.8500            | 183.4800     | 90.1200           | 92.3400     | 127.1567     |
| sum of squares $\sum x_i^2$               | 30,002.4200       | 72,248.1875          | 60,394.6875         | 101,037.0512 | 24,377.3432       | 25,599.2468 | 313,658.9362 |
| sample variance $s^2$                     | 1.2100            | 16.8100              | 15.2100             | 21.1600      | 6.2500            | 9.6100      | 1,330.6008   |
| sample std. dev. $s$                      | 1.1000            | 4.1000               | 3.9000              | 4.6000       | 2.5000            | 3.1000      | 36.4774      |
| std. dev. of mean $SE_{\bar{x}}$          | 0.6351            | 2.3671               | 2.2517              | 2.6558       | 1.4434            | 1.7898      | 8.5978       |
|                                           |                   |                      |                     |              |                   |             |              |
|                                           |                   |                      |                     |              |                   |             |              |
| One-way ANOVA of the treatments:          |                   |                      |                     |              |                   |             |              |
| source                                    | sum of squares SS | degrees of freedom v | mean square MS      | F statistic  | p-value           |             |              |
| treatment                                 | 22,479.7144       | 5                    | 4,495.9429          | 383.9951     | <b>8.3522e-13</b> |             |              |
| error                                     | 140.5000          | 12                   | 11.7083             |              |                   |             |              |
| total                                     | 22,620.2144       | 17                   |                     |              |                   |             |              |
|                                           |                   |                      |                     |              |                   |             |              |
| Tukey HSD results                         |                   |                      |                     |              |                   |             |              |
| treatments                                | Tukey HSD         | Tukey HSD            | Tukey HSD           |              |                   |             |              |
| pair                                      | Q statistic       | p-value              | inference           |              |                   |             |              |
| <b>K vs mO</b>                            | 27.9163           | <b>0.0010053</b>     | <b>** p&lt;0.01</b> |              |                   |             |              |
| <b>K vs mD</b>                            | 21.1840           | <b>0.0010053</b>     | <b>** p&lt;0.01</b> |              |                   |             |              |
| <b>K vs mC</b>                            | 42.2567           | <b>0.0010053</b>     | <b>** p&lt;0.01</b> |              |                   |             |              |
| <b>K vs mOD</b>                           | 5.0012            | <b>0.0371402</b>     | <b>* p&lt;0.05</b>  |              |                   |             |              |
| <b>K vs mDC</b>                           | 3.8774            | <b>0.1369165</b>     | insignificant       |              |                   |             |              |
| <b>mO vs mD</b>                           | 6.7323            | <b>0.0047827</b>     | <b>** p&lt;0.01</b> |              |                   |             |              |
| <b>mO vs mC</b>                           | 14.3403           | <b>0.0010053</b>     | <b>** p&lt;0.01</b> |              |                   |             |              |
| <b>mO vs mOD</b>                          | 32.9175           | <b>0.0010053</b>     | <b>** p&lt;0.01</b> |              |                   |             |              |
| <b>mO vs mDC</b>                          | 31.7938           | <b>0.0010053</b>     | <b>** p&lt;0.01</b> |              |                   |             |              |
| <b>mD vs mC</b>                           | 21.0727           | <b>0.0010053</b>     | <b>** p&lt;0.01</b> |              |                   |             |              |
| <b>mD vs mOD</b>                          | 26.1852           | <b>0.0010053</b>     | <b>** p&lt;0.01</b> |              |                   |             |              |
| <b>mD vs mCD</b>                          | 25.0614           | <b>0.0010053</b>     | <b>** p&lt;0.01</b> |              |                   |             |              |
| <b>mC vs mOD</b>                          | 47.2578           | <b>0.0010053</b>     | <b>** p&lt;0.01</b> |              |                   |             |              |
| <b>mC vs mDC</b>                          | 46.1341           | <b>0.0010053</b>     | <b>** p&lt;0.01</b> |              |                   |             |              |
| <b>mOD vs mDC</b>                         | 1.1237            | <b>0.8999947</b>     | insignificant       |              |                   |             |              |

|            | Average cell number | SD    |
|------------|---------------------|-------|
| <b>K</b>   | 800000              | 8801  |
| <b>O</b>   | 760000              | 32681 |
| <b>D</b>   | 810000              | 25921 |
| <b>C</b>   | 775000              | 31776 |
| <b>Kg</b>  | 220000              | 9901  |
| <b>Kf</b>  | 855000              | 31636 |
| <b>Km</b>  | 720000              | 19441 |
| <b>gO</b>  | 270000              | 3781  |
| <b>gD</b>  | 310000              | 6511  |
| <b>gC</b>  | 230000              | 4371  |
| <b>gOD</b> | 690000              | 24841 |
| <b>gDC</b> | 100000              | 1601  |
| <b>fO</b>  | 745000              | 23841 |
| <b>fD</b>  | 665000              | 21946 |
| <b>fC</b>  | 560000              | 13441 |
| <b>fOD</b> | 730000              | 26281 |
| <b>fDC</b> | 640000              | 17921 |
| <b>mO</b>  | 740000              | 25161 |
| <b>mD</b>  | 875000              | 36751 |
| <b>mC</b>  | 560000              | 16241 |
| <b>mOD</b> | 1140000             | 60421 |
| <b>mDC</b> | 580000              | 9861  |

| Descriptive statistics of the treatments: |                       |                       |                     |                |                   |                |                     |                         |  |
|-------------------------------------------|-----------------------|-----------------------|---------------------|----------------|-------------------|----------------|---------------------|-------------------------|--|
| Treatment →                               | K                     | O                     | D                   | C              | Kg                | Kf             | Km                  | Pooled Total            |  |
| observations N                            | 3                     | 3                     | 3                   | 3              | 3                 | 3              | 3                   | 21                      |  |
| sum $\sum x_i$                            | 2,400,000.0000        | 2,280,000.0000        | 2,430,000.0000      | 2,325,000.0000 | 660,000.0000      | 2,565,000.0000 | 2,160,000.0000      | 14,820,000.0000         |  |
| mean $\bar{x}$                            | 800,000.0000          | 760,000.0000          | 810,000.0000        | 775,000.0000   | 220,000.0000      | 855,000.0000   | 720,000.0000        | 705,714.2857            |  |
| sum of squares $\sum x_i^2$               | 1,920,154,915         | 1,734,936,095         | 1,969,643,796       | 1,803,894,428  | 145,396,059,66    | 2,195,076,672  | 1,555,955,904,962.0 | 11,325,057,873,114.0000 |  |
| sample variance $s^2$                     | 77,457,601.0000       | 1,068,047,761         | 671,898,241.00      | 1,009,714,176  | 98,029,801.0000   | 1,000,836,496  | 377,952,481.0000    | 43,318,607,941.4143     |  |
| sample std. dev. $s$                      | 8,801.0000            | 32,681.0000           | 25,921.0000         | 31,776.0000    | 9,901.0000        | 31,636.0000    | 19,441.0000         | 208,131.2277            |  |
| std. dev. of mean $SE_{\bar{x}}$          | 5,081.2597            | 18,868.3841           | 14,965.4963         | 18,345.8822    | 5,716.3450        | 18,265.0531    | 11,224.2666         | 45,417.9574             |  |
| <b>One-way ANOVA of the treatments:</b>   |                       |                       |                     |                |                   |                |                     |                         |  |
| source                                    | sum of squares SS     | degrees of freedom vv | mean square MS      | F statistic    | p-value           |                |                     |                         |  |
| treatment                                 | 857,764,285.71        | 6                     | 142,960,714.28      | 232.5139       | <b>3.3806e-13</b> |                |                     |                         |  |
| error                                     | 8,607,873,114.4       | 14                    | 614,848,079.5714    |                |                   |                |                     |                         |  |
| total                                     | 866,372,158.81        | 20                    |                     |                |                   |                |                     |                         |  |
| <b>Tukey HSD results</b>                  |                       |                       |                     |                |                   |                |                     |                         |  |
| treatments pair                           | Tukey HSD Q statistic | Tukey HSD p-value     | Tukey HSD inference |                |                   |                |                     |                         |  |
| <b>K vs O</b>                             | 2.7941                | <b>0.4698752</b>      | insignificant       |                |                   |                |                     |                         |  |
| <b>K vs D</b>                             | 0.6985                | <b>0.8999947</b>      | insignificant       |                |                   |                |                     |                         |  |
| <b>K vs C</b>                             | 1.7463                | <b>0.8571221</b>      | insignificant       |                |                   |                |                     |                         |  |
| <b>K vs Kg</b>                            | 40.5140               | <b>0.0010053</b>      | ** p<0.01           |                |                   |                |                     |                         |  |
| <b>K vs Kf</b>                            | 3.8418                | <b>0.1646564</b>      | insignificant       |                |                   |                |                     |                         |  |
| <b>K vs Km</b>                            | 5.5881                | <b>0.0189808</b>      | * p<0.05            |                |                   |                |                     |                         |  |
| <b>O vs D</b>                             | 3.4926                | <b>0.2412018</b>      | insignificant       |                |                   |                |                     |                         |  |
| <b>O vs C</b>                             | 1.0478                | <b>0.8999947</b>      | insignificant       |                |                   |                |                     |                         |  |
| <b>O vs Kg</b>                            | 37.7199               | <b>0.0010053</b>      | ** p<0.01           |                |                   |                |                     |                         |  |
| <b>O vs Kf</b>                            | 6.6359                | <b>0.0049383</b>      | ** p<0.01           |                |                   |                |                     |                         |  |
| <b>O vs Km</b>                            | 2.7941                | <b>0.4698752</b>      | insignificant       |                |                   |                |                     |                         |  |
| <b>D vs C</b>                             | 2.4448                | <b>0.5990719</b>      | insignificant       |                |                   |                |                     |                         |  |
| <b>D vs Kg</b>                            | 41.2125               | <b>0.0010053</b>      | ** p<0.01           |                |                   |                |                     |                         |  |
| <b>D vs Kf</b>                            | 3.1433                | <b>0.3432522</b>      | insignificant       |                |                   |                |                     |                         |  |
| <b>D vs Km</b>                            | 6.2866                | <b>0.0077161</b>      | ** p<0.01           |                |                   |                |                     |                         |  |
| <b>C vs Kg</b>                            | 38.7677               | <b>0.0010053</b>      | ** p<0.01           |                |                   |                |                     |                         |  |
| <b>C vs Kf</b>                            | 5.5881                | <b>0.0189808</b>      | * p<0.05            |                |                   |                |                     |                         |  |
| <b>C vs Km</b>                            | 3.8418                | <b>0.1646564</b>      | insignificant       |                |                   |                |                     |                         |  |
| <b>Kg vs Kf</b>                           | 44.3558               | <b>0.0010053</b>      | ** p<0.01           |                |                   |                |                     |                         |  |
| <b>Kg vs Km</b>                           | 34.9258               | <b>0.0010053</b>      | ** p<0.01           |                |                   |                |                     |                         |  |
| <b>Kf vs Km</b>                           | 9.4300                | <b>0.0010053</b>      | ** p<0.01           |                |                   |                |                     |                         |  |

| Descriptive statistics of the treatments: |                       |                       |                     |                 |                   |                |                      |  |  |
|-------------------------------------------|-----------------------|-----------------------|---------------------|-----------------|-------------------|----------------|----------------------|--|--|
| Treatment →                               | K                     | gO                    | gD                  | gC              | gOD               | gDC            | Pooled Total         |  |  |
| observations N                            | 3                     | 3                     | 3                   | 3               | 3                 | 3              | 18                   |  |  |
| sum $\sum x_i$                            | 2,400,000.0000        | 810,000.0000          | 930,000.0000        | 690,000.0000    | 2,070,000.0000    | 300,000.0000   | 7,200,000.0000       |  |  |
| mean $\bar{x}$                            | 800,000.0000          | 270,000.0000          | 310,000.0000        | 230,000.0000    | 690,000.0000      | 100,000.0000   | 400,000.0000         |  |  |
| sum of squares $\sum x_i^2$               | 1,920,154,915         | 218,728,591.92        | 288,384,786.2       | 158,738,211.26  | 1,429,534,150     | 30,005,126,400 | 4,045,545,781,612.00 |  |  |
| sample variance $s^2$                     | 77,457,601.0000       | 14,295,961.0000       | 42,393,121.0000     | 19,105,641.0000 | 617,075,281.0000  | 2,563,201.0000 | 68,561,516,565.4118  |  |  |
| sample std. dev. $s$                      | 8,801.0000            | 3,781.0000            | 6,511.0000          | 4,371.0000      | 24,841.0000       | 1,601.0000     | 261,842.5416         |  |  |
| std. dev. of mean $SE_{\bar{x}}$          | 5,081.2597            | 2,182.9614            | 3,759.1276          | 2,523.5980      | 14,341.9580       | 924.3378       | 61,716.8789          |  |  |
| <b>One-way ANOVA of the treatments:</b>   |                       |                       |                     |                 |                   |                |                      |  |  |
| source+H56:H80                            | sum of squares SS     | degrees of freedom vv | mean square MS      | F statistic     | p-value           |                |                      |  |  |
| treatment                                 | 1,164,000,000.00      | 5                     | 232,800,000.00      | 1,807.2411      | <b>1.1102e-16</b> |                |                      |  |  |
| error                                     | 1,545,781,612.4       | 12                    | 128,815,134.3333    |                 |                   |                |                      |  |  |
| total                                     | 1,165,545,781.6       | 17                    |                     |                 |                   |                |                      |  |  |
| <b>Tukey HSD results</b>                  |                       |                       |                     |                 |                   |                |                      |  |  |
| treatments pair                           | Tukey HSD Q statistic | Tukey HSD p-value     | Tukey HSD inference |                 |                   |                |                      |  |  |
| <b>K vs gO</b>                            | 80.8822               | <b>0.0010053</b>      | ** p<0.01           |                 |                   |                |                      |  |  |
| <b>K vs gD</b>                            | 74.7779               | <b>0.0010053</b>      | ** p<0.01           |                 |                   |                |                      |  |  |
| <b>K vs gC</b>                            | 86.9865               | <b>0.0010053</b>      | ** p<0.01           |                 |                   |                |                      |  |  |
| <b>K vs gOD</b>                           | 16.7869               | <b>0.0010053</b>      | ** p<0.01           |                 |                   |                |                      |  |  |
| <b>K vs gDC</b>                           | 106.8256              | <b>0.0010053</b>      | ** p<0.01           |                 |                   |                |                      |  |  |
| <b>gO vs gD</b>                           | 6.1043                | <b>0.0099746</b>      | ** p<0.01           |                 |                   |                |                      |  |  |
| <b>gO vs gC</b>                           | 6.1043                | <b>0.0099746</b>      | ** p<0.01           |                 |                   |                |                      |  |  |
| <b>gO vs gOD</b>                          | 64.0953               | <b>0.0010053</b>      | ** p<0.01           |                 |                   |                |                      |  |  |
| <b>gO vs gDC</b>                          | 25.9434               | <b>0.0010053</b>      | ** p<0.01           |                 |                   |                |                      |  |  |
| <b>gD vs gC</b>                           | 12.2086               | <b>0.0010053</b>      | ** p<0.01           |                 |                   |                |                      |  |  |
| <b>gD vs gOD</b>                          | 57.9910               | <b>0.0010053</b>      | ** p<0.01           |                 |                   |                |                      |  |  |
| <b>gD vs gDC</b>                          | 32.0477               | <b>0.0010053</b>      | ** p<0.01           |                 |                   |                |                      |  |  |
| <b>gC vs gOD</b>                          | 70.1997               | <b>0.0010053</b>      | ** p<0.01           |                 |                   |                |                      |  |  |
| <b>gC vs gDC</b>                          | 19.8390               | <b>0.0010053</b>      | ** p<0.01           |                 |                   |                |                      |  |  |
| <b>gOD vs gDC</b>                         | 90.0387               | <b>0.0010053</b>      | ** p<0.01           |                 |                   |                |                      |  |  |

| Descriptive statistics of the treatments: |                      |                       |                     |                  |                   |                  |                      |
|-------------------------------------------|----------------------|-----------------------|---------------------|------------------|-------------------|------------------|----------------------|
| Treatment →                               | K                    | fO                    | fD                  | fC               | fOD               | fDC              | Pooled Total         |
| observations N                            | 3                    | 3                     | 3                   | 3                | 3                 | 3                | 18                   |
| sum $\sum_{i=1}^k x_i$                    | 2,400,000.0000       | 2,235,000.0000        | 1,995,000.0000      | 1,680,000.0000   | 2,190,000.0000    | 1,920,000.0000   | 12,420,000.0000      |
| mean $\bar{x}$                            | 800,000.0000         | 745,000.0000          | 665,000.0000        | 560,000.0000     | 730,000.0000      | 640,000.0000     | 690,000.0000         |
| sum of squares $\sum_{i=1}^k x_i^2$       | 1,920,154,915,       | 1,666,211,786,        | 1,327,638,253,      | 941,161,320,96   | 1,600,081,381,    | 1,229,442,324,   | 8,684,689,982,962.00 |
| sample variance $s^2$                     | 77,457,601.0000      | 568,393,281.0000      | 481,626,916.0000    | 180,660,481.0000 | 690,690,961.0000  | 321,162,241.0000 | 6,758,234,291.8824   |
| sample std. dev. $s$                      | 8,801.0000           | 23,841.0000           | 21,946.0000         | 13,441.0000      | 26,281.0000       | 17,921.0000      | 82,208.4807          |
| std. dev. of mean $SE\bar{x}$             | 5,081.2597           | 13,764.6078           | 12,670.5290         | 7,760.1650       | 15,173.3424       | 10,346.6942      | 19,376.7247          |
| <b>One-way ANOVA of the treatments:</b>   |                      |                       |                     |                  |                   |                  |                      |
| source                                    | sum of squares SS    | degrees of freedom vv | mean square MS      | F statistic      | p-value           |                  |                      |
| treatment                                 | 110,250,000.0000     | 5                     | 22,050,000.0000     | 57.0261          | <b>6.0351e-08</b> |                  |                      |
| error                                     | 4,639,982,962.0000   | 12                    | 386,665,246.8333    |                  |                   |                  |                      |
| total                                     | 114,889,982,962.0000 | 17                    |                     |                  |                   |                  |                      |
| <b>Tukey HSD results</b>                  |                      |                       |                     |                  |                   |                  |                      |
| treatments                                | Tukey HSD            | Tukey HSD             | Tukey HSD           |                  |                   |                  |                      |
| pair                                      | Q statistic          | p-value               | Inference           |                  |                   |                  |                      |
| <b>K vs fO</b>                            | 4.8446               | <b>0.0447549</b>      | <b>* p&lt;0.05</b>  |                  |                   |                  |                      |
| <b>K vs fD</b>                            | 11.8912              | <b>0.0010053</b>      | <b>** p&lt;0.01</b> |                  |                   |                  |                      |
| <b>K vs fC</b>                            | 21.1400              | <b>0.0010053</b>      | <b>** p&lt;0.01</b> |                  |                   |                  |                      |
| <b>K vs fOD</b>                           | 6.1658               | <b>0.0092762</b>      | <b>** p&lt;0.01</b> |                  |                   |                  |                      |
| <b>K vs fDC</b>                           | 14.0933              | <b>0.0010053</b>      | <b>** p&lt;0.01</b> |                  |                   |                  |                      |
| <b>fO vs fD</b>                           | 7.0467               | <b>0.0033320</b>      | <b>** p&lt;0.01</b> |                  |                   |                  |                      |
| <b>fO vs fC</b>                           | 16.2954              | <b>0.0010053</b>      | <b>** p&lt;0.01</b> |                  |                   |                  |                      |
| <b>fO vs fOD</b>                          | 1.3212               | <b>0.8999947</b>      | insignificant       |                  |                   |                  |                      |
| <b>fO vs fDC</b>                          | 9.2487               | <b>0.0010053</b>      | <b>** p&lt;0.01</b> |                  |                   |                  |                      |
| <b>fD vs fC</b>                           | 9.2487               | <b>0.0010053</b>      | <b>** p&lt;0.01</b> |                  |                   |                  |                      |
| <b>fD vs fOD</b>                          | 5.7254               | <b>0.0156417</b>      | <b>* p&lt;0.05</b>  |                  |                   |                  |                      |
| <b>fD vs fDC</b>                          | 2.2021               | <b>0.6252415</b>      | insignificant       |                  |                   |                  |                      |
| <b>fC vs fOD</b>                          | 14.9741              | <b>0.0010053</b>      | <b>** p&lt;0.01</b> |                  |                   |                  |                      |
| <b>fC vs fDC</b>                          | 7.0467               | <b>0.0033320</b>      | <b>** p&lt;0.01</b> |                  |                   |                  |                      |
| <b>fOD vs fDC</b>                         | 7.9275               | <b>0.0012432</b>      | <b>** p&lt;0.01</b> |                  |                   |                  |                      |

| Descriptive statistics of the treatments: |                      |                       |                     |                  |                    |                 |                       |
|-------------------------------------------|----------------------|-----------------------|---------------------|------------------|--------------------|-----------------|-----------------------|
| Treatment →                               | K                    | mO                    | mD                  | mC               | mOD                | mDC             | Pooled Total          |
| observations N                            | 3                    | 3                     | 3                   | 3                | 3                  | 3               | 18                    |
| sum $\sum_{i=1}^k x_i$                    | 2,400,000.0000       | 2,220,000.0000        | 2,625,000.0000      | 1,680,000.0000   | 3,420,000.0000     | 1,740,000.0000  | 14,085,000.0000       |
| mean $\bar{x}$                            | 800,000.0000         | 740,000.0000          | 875,000.0000        | 560,000.0000     | 1,140,000.0000     | 580,000.0000    | 782,500.0000          |
| sum of squares $\sum_{i=1}^k x_i^2$       | 1,920,154,915,       | 1,644,066,151,        | 2,299,576,272,      | 941,327,540,16   | 3,906,101,394,     | 1,009,394,478,  | 11,720,620,752,332.00 |
| sample variance $s^2$                     | 77,457,601.0000      | 633,075,921.0000      | 1,350,636,001.0000  | 263,770,081.0000 | 3,650,697,241.0000 | 97,239,321.0000 | 41,124,014,843.0588   |
| sample std. dev. $s$                      | 8,801.0000           | 25,161.0000           | 36,751.0000         | 16,241.0000      | 60,421.0000        | 9,861.0000      | 202,790.5689          |
| std. dev. of mean $SE\bar{x}$             | 5,081.2597           | 14,526.7101           | 21,218.1997         | 9,376.7457       | 34,884.0806        | 5,693.2510      | 47,798.1955           |
| <b>One-way ANOVA of the treatments:</b>   |                      |                       |                     |                  |                    |                 |                       |
| source                                    | sum of squares SS    | degrees of freedom vv | mean square MS      | F statistic      | p-value            |                 |                       |
| treatment                                 | 686,962,500.0000     | 5                     | 137,392,500.0000    | 135.7438         | <b>3.9421e-10</b>  |                 |                       |
| error                                     | 12,145,752,332.0000  | 12                    | 1,012,146,027.6667  |                  |                    |                 |                       |
| total                                     | 699,108,252,332.0000 | 17                    |                     |                  |                    |                 |                       |
| <b>Tukey HSD results</b>                  |                      |                       |                     |                  |                    |                 |                       |
| treatments                                | Tukey HSD            | Tukey HSD             | Tukey HSD           |                  |                    |                 |                       |
| pair                                      | Q statistic          | p-value               | Inference           |                  |                    |                 |                       |
| <b>K vs mO</b>                            | 3.2666               | <b>0.2618588</b>      | insignificant       |                  |                    |                 |                       |
| <b>K vs mD</b>                            | 4.0832               | <b>0.1088206</b>      | insignificant       |                  |                    |                 |                       |
| <b>K vs mC</b>                            | 13.0662              | <b>0.0010053</b>      | <b>** p&lt;0.01</b> |                  |                    |                 |                       |
| <b>K vs mOD</b>                           | 18.5105              | <b>0.0010053</b>      | <b>** p&lt;0.01</b> |                  |                    |                 |                       |
| <b>K vs mDC</b>                           | 11.9774              | <b>0.0010053</b>      | <b>** p&lt;0.01</b> |                  |                    |                 |                       |
| <b>mO vs mD</b>                           | 7.3498               | <b>0.0023643</b>      | <b>** p&lt;0.01</b> |                  |                    |                 |                       |
| <b>mO vs mC</b>                           | 9.7997               | <b>0.0010053</b>      | <b>** p&lt;0.01</b> |                  |                    |                 |                       |
| <b>mO vs mOD</b>                          | 21.7770              | <b>0.0010053</b>      | <b>** p&lt;0.01</b> |                  |                    |                 |                       |
| <b>mO vs mDC</b>                          | 8.7108               | <b>0.0010053</b>      | <b>** p&lt;0.01</b> |                  |                    |                 |                       |
| <b>mD vs mC</b>                           | 17.1494              | <b>0.0010053</b>      | <b>** p&lt;0.01</b> |                  |                    |                 |                       |
| <b>mD vs mOD</b>                          | 14.4273              | <b>0.0010053</b>      | <b>** p&lt;0.01</b> |                  |                    |                 |                       |
| <b>mD vs mDC</b>                          | 16.0606              | <b>0.0010053</b>      | <b>** p&lt;0.01</b> |                  |                    |                 |                       |
| <b>mC vs mOD</b>                          | 31.5767              | <b>0.0010053</b>      | <b>** p&lt;0.01</b> |                  |                    |                 |                       |
| <b>mC vs mDC</b>                          | 1.0889               | <b>0.8999947</b>      | insignificant       |                  |                    |                 |                       |
| <b>mOD vs mDC</b>                         | 30.4879              | <b>0.0010053</b>      | <b>** p&lt;0.01</b> |                  |                    |                 |                       |
